# Supplementary material for: Myeloid Dendritic Cells Induce HIV-1 Latency in Non-proliferating CD4+ T Cells
Source: PLOS journal article supplement (doi:10.1371/journal.ppat.1003799), 2013-12-05

Figure S3

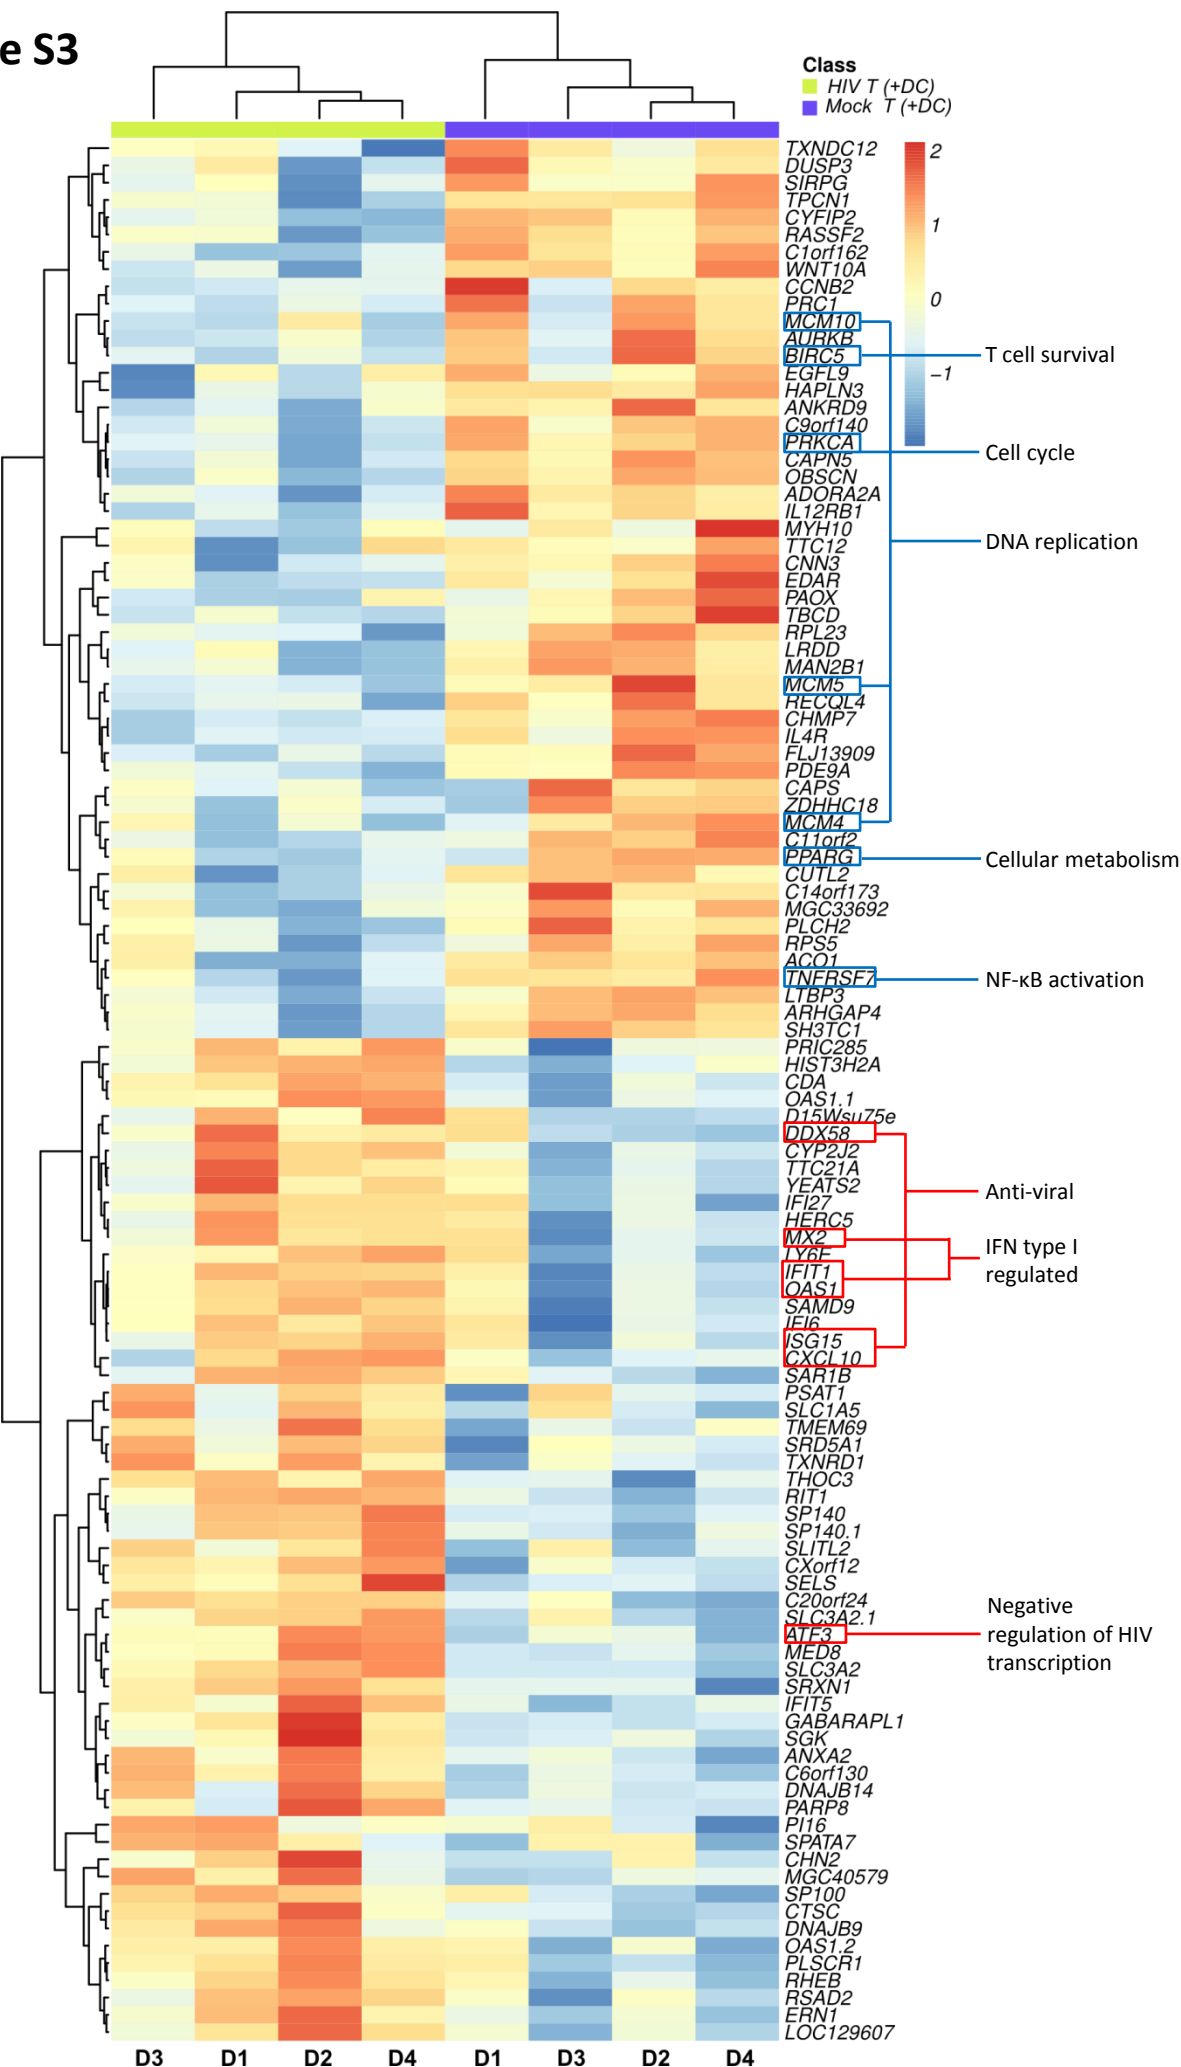

Supplement: S3 (10.1371/journal.ppat.1003799.s003) [file journal.ppat.1003799.s003]
